# Supplementary material
Source: publisher figshare collection journal article supplement (https://frontiersin.figshare.com/ndownloader/files/12952913)
Supplement: Supplementary file 1 [file 12952913]

Supplementary table 1 Geographical coordinates of the sampling spots in the Darss-Zingst Boddenchain with start and end points of the transects.

| Station | Start point | | End point | |
| --- | --- | --- | --- | --- |
| Latitude | Longitude | Latitude | Longitude |
| Pütnitz – SB | N 54° 15.200 | E 12° 25.700 | N 54° 15.200 | E 12° 25.600 |
| Althagen – SB | N 54° 21.900 | E 12° 24.950 | N 54° 21.783 | E 12° 25.872 |
| Bliesenrade – BoB | N 54° 23.300 | E 12° 35.800 | N 54° 23.274 | E 12° 36.050 |
| Fastbültenhaken – BoB | N 54° 24.434 | E 12° 37.093 | N 54° 24.300 | E 12° 37.400 |
| Zingst – BB | N 54° 25.803 | E 12° 41.232 | N 54° 25.788 | E 12° 41.258 |
| Salzhaken – BB | N 54° 24.700 | E 12° 45.800 | N 54° 24.548 | E 12° 45.333 |
| Dabitz – GB | N 54° 22.050 | E 12° 48.438 | N 54° 22.110 | E 12° 49.581 |
| Nisdorf – GB | N 54° 22.308 | E 12° 52.764 | N 54° 22.281 | E 12° 51.842 |
